# Supplementary material
Source: publisher site journal article supplement (https://www.dovepress.com/article/456872)
Supplement: Supplementary file 1 [file get_supplementary_file.php]

**Supplementary Table 1.** Multivariate logistic regression analysis of ischemic stroke risk

|  | OR | 95%CI | *p*-value |
| --- | --- | --- | --- |
| **Model 1** |  |  |  |
| Degree of stenosis | 2.370 | 1.429–3.932 | 0.001 |
| Plaque echogenicity | 2.013 | 1.248–3.248 | 0.004 |
| Smoking | 1.873 | 1.177–2.979 | 0.008 |
| **Model 2** |  |  |  |
| Degree of stenosis | 2.440 | 1.442–4.130 | 0.001 |
| Plaque echogenicity | 1.984 | 1.207–3.262 | 0.007 |
| Smoking | 1.716 | 1.056–2.787 | 0.029 |
| IPN | 2.684 | 1.654-4.352 | <0.0001 |

**Abbreviations:** IPN: intraplaque neovascularization; CI, confidence interval; OR, odds ratio

**Supplementary Figure 1** Calibration curves for the optimal model


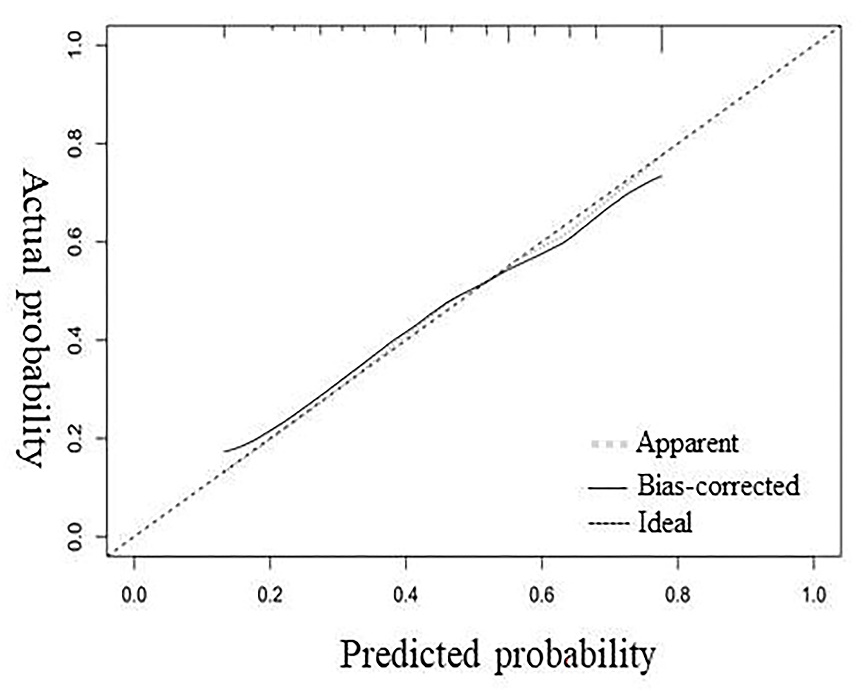


The calibration curve shows good agreement between the predicted probabilities and actual observations.
